# Supplementary material
Source: publisher figshare collection journal article supplement (https://acs.figshare.com/ndownloader/files/5140834)
Supplement: Supplementary file 1 [file 5140834]

## Supplementary Material

### Protein Preparation, Crystallization, Data collection and Structure Resolution

Human estrogen receptor alpha-ligand binding domain (ER $\alpha$ -LBD, Ser301 to Thr553) with three Cys to Ser substitutions (C381S, C417S, C530S) was cloned and expressed in *Escherichia coli*. Protein purification was done as described previously.<sup>1</sup> The ER $\alpha$ -LBD in 50 mM Tris-HCl buffer (pH 8.0,) 50 mM NaCl, 2 mM DTT (1,4-Dithio-DL-threitol) and 2  $\mu$ M **29**, was concentrated to 10 mg/mL prior to crystallization.

Crystals were grown in a hanging drop setup (Linbro plate) at room temperature (20 °C). The reservoir buffer contained 100 mM Bicine buffer (pH = 9.0), 28% PEG-550 MME and 100 mM NaCl. The hanging drop was made by mixing 1  $\mu$ L protein solution with 1  $\mu$ L reservoir solution.

Crystals were cryoprotected by adding 1  $\mu$ L reservoir solution to the hanging drop (30 s equilibration time), then mounted in a cryo-loop and frozen directly at 100 K in the nitrogen stream. The first diffraction data set ("data set I", c.f. Table 1) was collected to 2.05 Å from a single frozen crystal on a MAR345 imaging plate system (150  $\mu$ m pixel size, 240 mm plate) at the Swiss Norwegian Beam line of the ESRF (Grenoble, F). 215 Images were collected with 1.0° rotation each, using an exposure time of 30 s per frame and a crystal-to-detector distance of 235 mm. Because of incompleteness (due to overloads) in the low resolution range of data set I, a second data set ("data set II", c.f. Table 1) using a second crystal was collected in house to 2.4 Å on an EnrafNonius FR591 rotating Cu-anode generator (operating at 45 kV, 90 mA) equipped with a MacScience DIP2030 imageplate system. A total of 326 diffraction

images were recorded at 100 K with an exposure time of 2000 s for 1.0° rotation per image at a crystal-to-detector distance of 195 mm. The two data sets were processed and subsequently merged with the HKL program suite version 1.6.1<sup>2</sup> and structure factor amplitudes were generated with the CCP4 4.0-package<sup>3,4</sup>. Data processing and merging statistics are shown in Table 1. The space group is P2<sub>1</sub> with unit cell parameters  $a = 55.1 \text{ \AA}$ ,  $b = 156.6 \text{ \AA}$ ,  $c = 59.0 \text{ \AA}$  and  $\beta = 90.4^\circ$ . There are four complexes of ER $\alpha$  LBD/**29** (forming two dimers) per asymmetric unit. The estimated B-factor by Wilson plot is  $31.9 \text{ \AA}^2$ .

**Table 1. Data processing and merging statistics for data sets I+II**

|                                              |                                                                                                  |
|----------------------------------------------|--------------------------------------------------------------------------------------------------|
| X-ray source (data set I)                    | SNBL Grenoble ( $\lambda = 0.8727\text{\AA}$ )                                                   |
| X-ray source (data set II)                   | CuK $\alpha$ ( $\lambda = 1.5418\text{\AA}$ )                                                    |
| Temperature of data collection               | 100K                                                                                             |
| Number of crystals                           | 2                                                                                                |
| Space group                                  | P2 <sub>1</sub>                                                                                  |
| Unit cell dimensions                         | a = 55.1 $\text{\AA}$ , b = 156.6 $\text{\AA}$ , c = 59.0 $\text{\AA}$ ,<br>$\beta = 90.4^\circ$ |
| Number of monomers / asymmetric unit         | 4                                                                                                |
| Matthews coefficient (Vm)                    | 2.2 $\text{\AA}^3/\text{Da}$                                                                     |
| Solvent content                              | 44 %                                                                                             |
| Overall B-factor from Wilson plot            | 31.9 $\text{\AA}^2$                                                                              |
| Resolution range (last shell)                | 10.0 - 2.05 $\text{\AA}$ ( 2.12 - 2.05 $\text{\AA}$ )                                            |
| Number of observations                       | 403555                                                                                           |
| Number of unique reflection                  | 59332                                                                                            |
| Mosaicity                                    | 0.61 $^\circ$                                                                                    |
| Data redundancy (last shell)                 | 6.8 (4.9)                                                                                        |
| Data completeness (last shell)               | 95.2 % (89.9 %)                                                                                  |
| $\langle I / \sigma(I) \rangle$ (last shell) | 22.3 (1.8)                                                                                       |
| R <sub>merge</sub> on I (last shell)         | 9.5 % ( 42.2 % )                                                                                 |

The structure was determined by molecular replacement using the coordinates of the ligand binding domain (LBD) of human ER $\alpha$  (PDB accession code 1UOM<sup>1</sup>) as a starting model. Molecular replacement was performed with MOLREP<sup>4</sup>, using all measured data between 10 and 3  $\text{\AA}$ . A clear solution was found with a correlation-coefficient of 54.3%, an R-factor of 46.5%, having 4 molecules in the asymmetric unit. The program REFMAC version 5.0<sup>5</sup> was used for refinement. Bulk solvent

correction, an initial anisotropic B factor correction and restrained isotropic atomic B-factor refinement were applied. The refinement target was the maximum-likelihood target using amplitudes. No sigma cut-off was applied on the structure factor amplitudes and NCS-restraints were not applied. Cross-validation was used throughout refinement using a test set comprising 5.1% (2992) of the unique reflections. Water molecules were identified with the program ARP/wARP<sup>6</sup> and selected based on difference peak height (greater than  $3.0\sigma$ ) and distance criteria. Water molecules with temperature factors greater than  $70\text{\AA}^2$  were rejected. The program O version 7.0<sup>7</sup> was used for model rebuilding and the quality of the final refined model (Table 2) was assessed with the programs PROCHECK version 3.3<sup>8</sup> and REFMAC version 5.0<sup>6</sup>. The final model contains residues 307-330, 341-461, 464-528, 535-548 for chains A, C and residues 307-330, 341-461, 464-525, 535-548 for chains B, D. For the superposition (using the lsq-option in O<sup>7</sup>) of the complex ER $\alpha$ -LBD/29 (chain identifiers A/L) with ER $\alpha$ -LBD/raloxifene (PDB accession code 1ERR<sup>9</sup>), the C $\alpha$  coordinates of the respective residues 307-330, 341-419, 421-459, 470-525 and 535-546 were used, yielding a root mean square deviation (rmsd)-value of 0.56 Å. A superposition with the complex of ER $\alpha$ -LBD containing estradiol (PDB accession code 1QKT<sup>10</sup>) using the same C $\alpha$  coordinates yielded an rmsd-value of 0.66 Å. A superposition with the complex of ER $\alpha$ -LBD containing estradiol (PDB accession code 1UOM<sup>10</sup>) using the same C $\alpha$  coordinates yielded an rmsd-value of 0.69 Å. Pictures were made with O<sup>7</sup>.

Structure factors and coordinates for the refined structure were deposited in the protein structure database (PDB ID code: 1XQC).

**Table 2: Refinement statistics**

|                                                             |                                                                                       |
|-------------------------------------------------------------|---------------------------------------------------------------------------------------|
| <i>Data used in refinement:</i>                             |                                                                                       |
| - resolution range (last shell)                             | 10.0 - 2.05 Å (2.10 - 2.05 Å)                                                         |
| - intensity cutoff (Sigma(F))                               | None                                                                                  |
| - number of reflections                                     | 55974                                                                                 |
| - completeness [working + test set] (last shell)            | 95.3 % (89.9 %)                                                                       |
| - test set                                                  | 5.1 % (2992 reflections)                                                              |
| <i>Fit to data used in refinement:</i>                      |                                                                                       |
| - overall $R_{\text{cryst}}$ (last shell)                   | 21.1 % (32.4 %)                                                                       |
| - overall $R_{\text{free}}$ (last shell)                    | 25.4 % (35.2 %)                                                                       |
| <i>Number of non-hydrogen atoms used in the refinement:</i> |                                                                                       |
| - protein atoms (total of chains A, B, C, D)                | 7116                                                                                  |
| - ligand atoms (total of chains L, M, N, O)                 | 132                                                                                   |
| - water molecules (chain W)                                 | 374                                                                                   |
| Mean temperature factors for protein chains A, B, C, D      | 43.2 Å <sup>2</sup> , 46.6 Å <sup>2</sup> , 45.5 Å <sup>2</sup> , 44.4 Å <sup>2</sup> |
| Mean temperature factors for ligand chains L, M, N, O       | 33.2 Å <sup>2</sup> , 35.1 Å <sup>2</sup> , 32.6 Å <sup>2</sup> , 36.6 Å <sup>2</sup> |
| Mean temperature factors for water molecules chain W        | 47.0 Å <sup>2</sup>                                                                   |
| <i>Deviations from ideal geometry:</i>                      |                                                                                       |
| - bond length                                               | 0.018 Å                                                                               |
| - bond angles                                               | 1.55°                                                                                 |
| - esu based on R-value                                      | 0.245 Å                                                                               |
| - esu based on maximum likelihood                           | 0.169 Å                                                                               |
| - Ramachandran plot outliers                                | none                                                                                  |
| - G factor from PROCHECK                                    | 0.10                                                                                  |

**Acknowledgement:**

The support of R.Cebe, M. Mahnke, E.Koch and P. Graff in cloning, expression, purification and mass spectrometry analysis of ER $\alpha$ -LBD is gratefully acknowledged. Experimental assistance from the staff of the Swiss-Norwegian Beam Line at the European Synchrotron Radiation Facilities in Grenoble is gratefully acknowledged.

**References:**

- (1) Renaud, J.; Bischoff, S. F.; Buhl, T.; Floersheim, P.; Fournier, B.; Halleux, C.; Kallen, J.; Keller, H.; Schlaeppli, J.-M.; Stark, W. *J. Med. Chem.* **2003**, *46*, 2945-2957.
- (2) Otwinowski, Z.; Minor, W. Processing of X-ray Diffraction Data Collected in Oscillation Mode. In *Methods in Enzymology, Macromolecular Crystallography, part A*; Carter, C. W. Jr., Sweet, R. M., Eds., Academic Press: San Diego, 1997, Vol. 276; pp 307-326.
- (3) French, G. S.; Wilson, K. S. On the Treatment of Negative Intensity Observations. *Acta Crystallogr., Sect. A* **1978**, *34*, 517-525.
- (4) Collaborative Computational Project, Number 4. The CCP4 Suite: Programs for Protein Crystallography. *Acta Crystallogr., Sect. D* **1994**, *50*, 760-763.
- (5) Murshudov, G.N.; Vagin, A.A.; Dodson, E.J. Refinement of Macromolecular Structures by the Maximum-Likelihood Method. *Acta Crystallogr., Sect.D* **1997**, *53*, 240-255.
- (6) Perrakis, A.; Sixma, T.K.; Wilson, K.S.; Lamzin, V.S. wARP: Improvement and Extension of Crystallographic Phases by Weighted Averaging of Multiple-Refined Dummy Atomic Models. *Acta Crystallogr., Sect.D* **1997**, *53*, 448-455.

- (7) Kleywegt, G. J.; Jones, T. A. Model Building and Refinement Practice. In *Methods in Enzymology, Macromolecular Crystallography, part B*; Carter, C. W. Jr., Sweet, R. M., Eds., Academic Press: San Diego, 1997, Vol. 277; pp 208-230.
- (8) Laskowski, R.A.; MacArthur M.W.; Moss, D. S.; Thornton, J. M. PROCHECK: a Program to Check the Stereochemical Quality of Protein Structures. *J. Appl. Crystallogr.*, **1993**, *26*, 283-291.
- (9) Brzozowski, A. M.; Pike, A. C. W.; Dauter, Z.; Hubbard, R. E.; Bonn, T.; Engström, O.; Ohman, L.; Greene, G. L.; Gustafsson, J. Å.; Carlquist, M. Molecular Basis of Agonism and Antagonism in the Oestrogen Receptor. *Nature* **1997**, *389*, 753-758.
- (10) Gangloff, M.; Ruff, M.; Eiler, S.; Duclaud, S.; Wurtz, J.-M.; Moras, D. Crystal Structure of a Mutant hER $\alpha$  Ligand-Binding Domain Reveals Key Structural Features for the Mechanism of Partial Agonism. *J. Biol. Chem.* **2001**, *276*, 15059-15065.
